# Supplementary material
Source: PubMed Central journal article supplement (PMC10314748)
Supplement: NIHMS1898893-supplement-1.pdf [file NIHMS1898893-supplement-1.pdf]

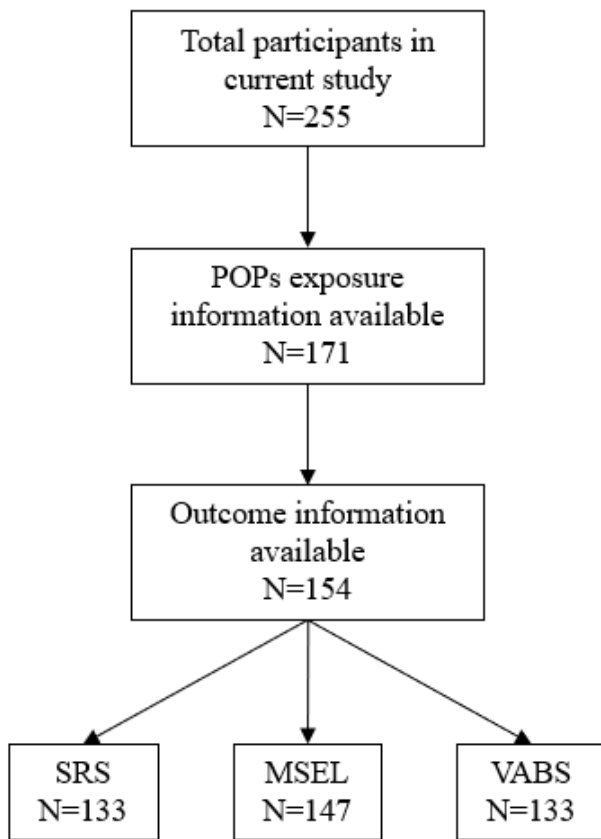

Figure S1. Flowchart of the study population. SRS; Social Responsiveness Scale; MSEL: Mullen Scales of Early Learning; VABS: Vineland Adaptive Behavior Scales.

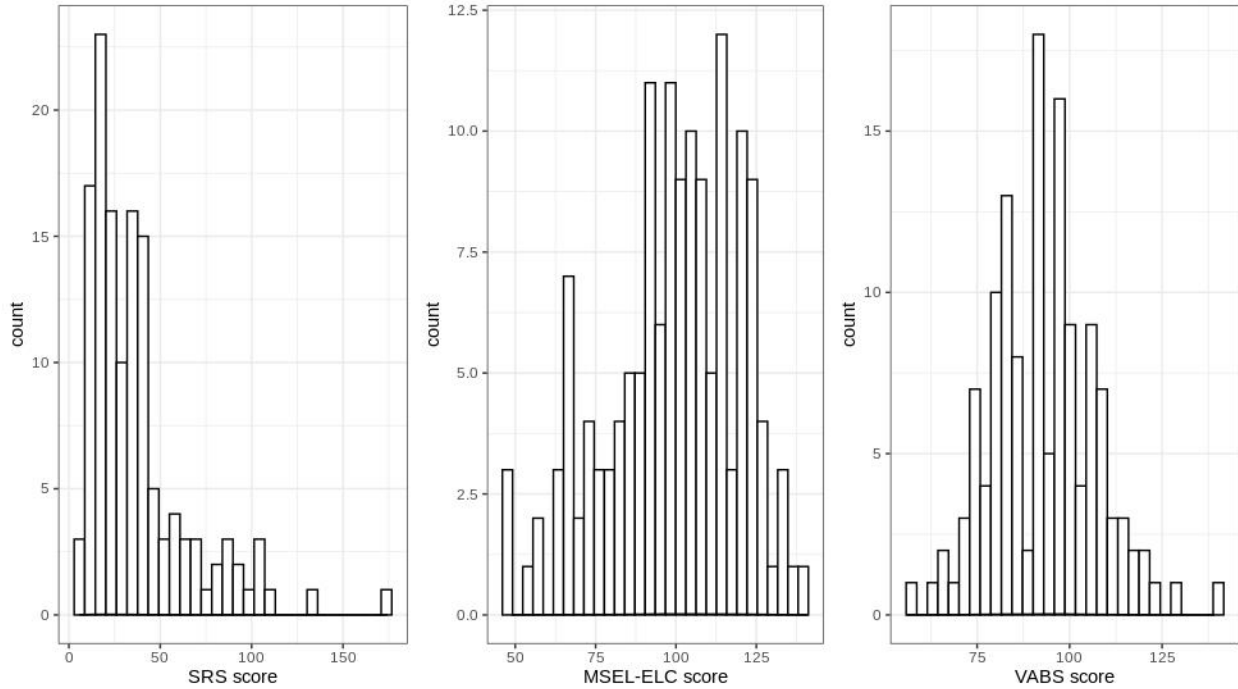

**Figure S2.** Distribution of ASD-related outcomes in EARLI. The total sample size for the outcomes:  $n=133$  for SRS,  $n=147$  for MSEL,  $n=133$  for VABS. SRS, Social Responsiveness Scale; MSEL, Mullen Scales of Early Learning; MSEL-ELC, Mullen Scales of Early Learning early learning composite; VABS, Vineland Adaptive Behavior Rating Scales.

**Table S1. Description of POPs included in the analysis**

| <b>Abbreviation</b> | <b>IUPAC name</b>                                        |
|---------------------|----------------------------------------------------------|
| PCB28               | 2,4,4'-triCB                                             |
| PCB74               | 2,4,4',5-tetraCB                                         |
| PCB99               | 2,2',4,4',5-pentaCB                                      |
| PCB118              | 2,3',4,4',5-pentaCB                                      |
| PCB153              | 2,2',4,4',5,5'-hexaCB                                    |
| PCB138/158          | 2,2',3,4,4',5'-hexaCB and 2,3,3',4,4',6-hexaCB           |
| PCB170              | 2,2',3,3',4,4',5-heptaCB                                 |
| PCB180              | 2,2',3,4,4',5,5'-heptaCB                                 |
| PCB187              | 2,2',3,4',5,5',6-heptaCB                                 |
| PCB196/203          | 2,2',3,3',4,4',5',6-octaCB and 2,2',3,4,4',5,5',6-octaCB |
| PBDE47              | 2,2',4,4'-tetrabromodiphenyl ether                       |
| PBDE99              | 2,2',3,3',4-pentabromodiphenyl ether                     |
| PBDE100             | 2,2',4,4',6-pentabromodiphenyl ether                     |
| PBDE153             | 2,2',4,4',5,5'-hexabromodiphenyl ether                   |
| HCB                 | Hexachlorobenzene                                        |
| <i>p,p'</i> -DDE    | 2,2-Bis(4-chlorophenyl)-1,1-dichloroethene               |

**Table S2.** Posterior inclusion probabilities for group inclusion and conditional inclusion from BKMR model results

| POPs             | Group      | SRS      |         | MSEL     |         | VABS     |         |
|------------------|------------|----------|---------|----------|---------|----------|---------|
|                  |            | groupPIP | condPIP | groupPIP | condPIP | groupPIP | condPIP |
| PCB28            | PCBs       | 0.43     | 0.08    | 0.63     | 0.03    | 0.62     | 0.03    |
| PCB74            | PCBs       | 0.43     | 0.06    | 0.63     | 0.03    | 0.62     | 0.03    |
| PCB99            | PCBs       | 0.43     | 0.05    | 0.63     | 0.02    | 0.62     | 0.05    |
| PCB118           | PCBs       | 0.43     | 0.05    | 0.63     | 0.04    | 0.62     | 0.04    |
| PCB153           | PCBs       | 0.43     | 0.12    | 0.63     | 0.09    | 0.62     | 0.11    |
| PCB138/158       | PCBs       | 0.43     | 0.07    | 0.63     | 0.05    | 0.62     | 0.08    |
| PCB170           | PCBs       | 0.43     | 0.07    | 0.63     | 0.24    | 0.62     | 0.16    |
| PCB180           | PCBs       | 0.43     | 0.27    | 0.63     | 0.26    | 0.62     | 0.18    |
| PCB187           | PCBs       | 0.43     | 0.15    | 0.63     | 0.14    | 0.62     | 0.16    |
| PCB196/203       | PCBs       | 0.43     | 0.07    | 0.63     | 0.10    | 0.62     | 0.16    |
| PBDE47           | PBDEs      | 0.58     | 0.41    | 0.71     | 0.30    | 0.41     | 0.29    |
| PBDE99           | PBDEs      | 0.58     | 0.30    | 0.71     | 0.49    | 0.41     | 0.27    |
| PBDE100          | PBDEs      | 0.58     | 0.24    | 0.71     | 0.16    | 0.41     | 0.21    |
| PBDE153          | PBDEs      | 0.58     | 0.06    | 0.71     | 0.05    | 0.41     | 0.23    |
| HCB              | Pesticides | 0.41     | 0.17    | 0.41     | 0.57    | 0.49     | 0.29    |
| <i>p,p'</i> -DDE | Pesticides | 0.41     | 0.83    | 0.41     | 0.43    | 0.49     | 0.71    |

Models adjusted for study site, child's sex, maternal education, maternal race/ethnicity, and maternal pre-pregnancy BMI. Note: PCB, polychlorinated biphenyl; PBDE, polybrominated diphenyl ethers; HCB, hexachlorobenzene; *p,p'*-DDE, *p,p'*-dichlorodiphenyldichloroethen, SRS, Social Responsiveness Scale; MSEL-ELC, Mullen Scales of Early Learning early learning composite; VABS, Vineland Adaptive Behavior Rating Scales; BMI, body mass index.

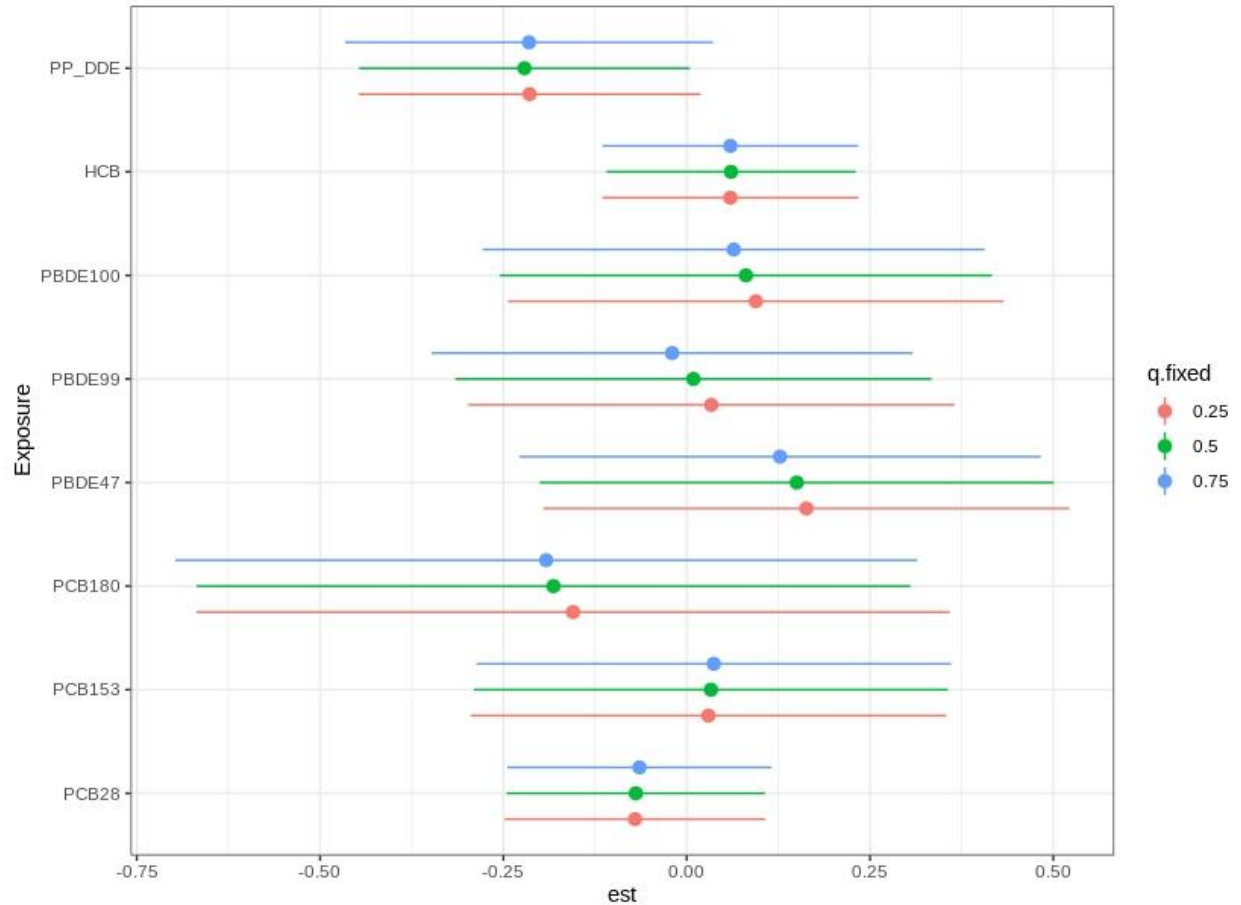

**Figure S3.** The single-exposure effects of each individual POPs congeners on SRS score (with corresponding 95% confidence intervals) are shown when an individual POP exposure was at its 75th percentile as compared to its 25th percentile, when all of the other POPs were fixed at a specific exposure percentile (25th, 50th, or 75th, respectively). Only POPs that were associated with SRS score from previous univariate exposure-response results were included in this analysis. Models adjusted for study site, child's sex, maternal education, maternal race, and maternal pre-pregnancy BMI. POPs were scaled in the BKMR models

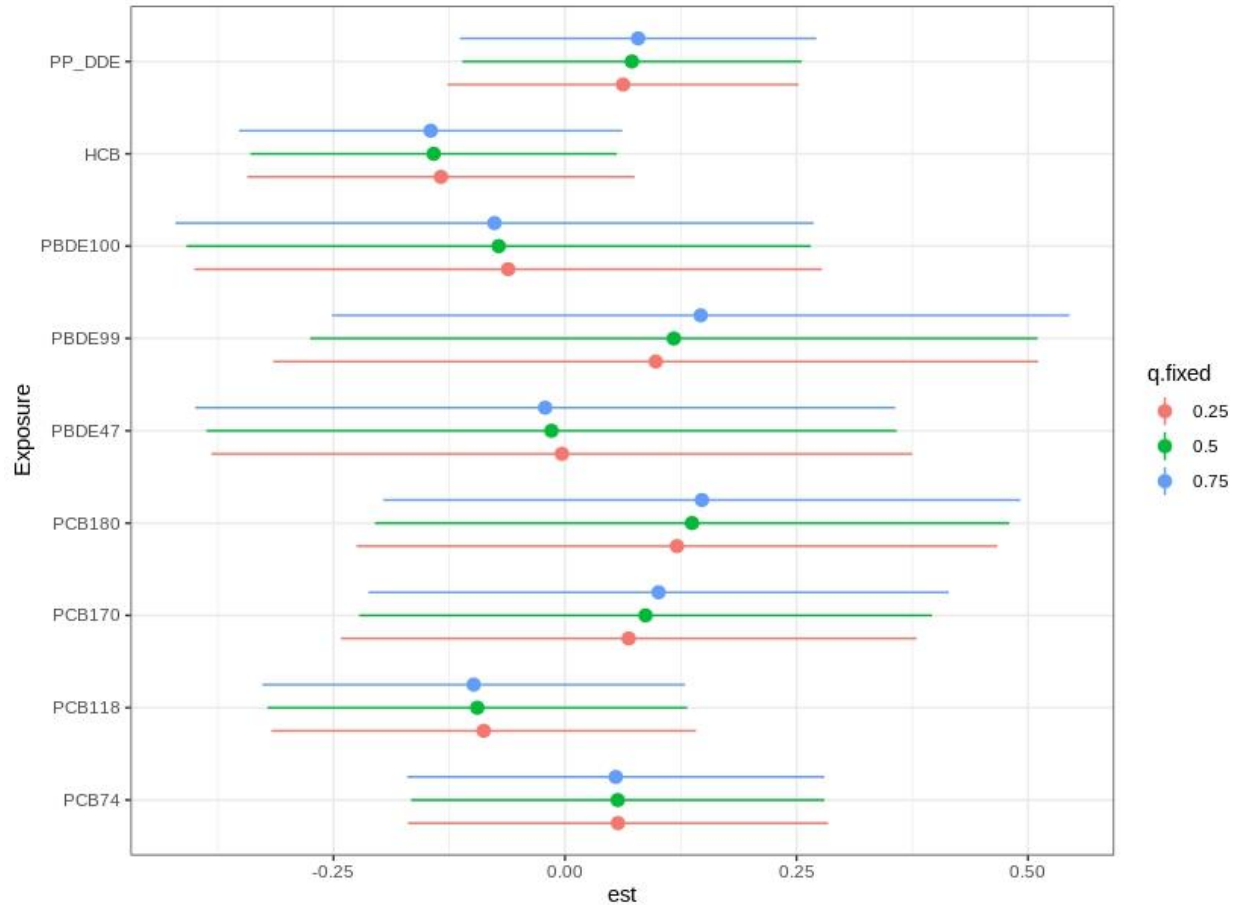

**Figure S4.** The single-exposure effects of each individual POPs congeners on MSEL-ELC score (with corresponding 95% confidence intervals) are shown when an individual POP exposure was at its 75th percentile as compared to its 25th percentile, when all of the other POPs were fixed at a specific exposure percentile (25th, 50th, or 75th, respectively). Only POPs that were associated with MSEL score from previous univariate exposure-response results were included in this analysis. Models adjusted for study site, child's sex, maternal education, maternal race, and maternal pre-pregnancy BMI. POPs were scaled in the BKMR models

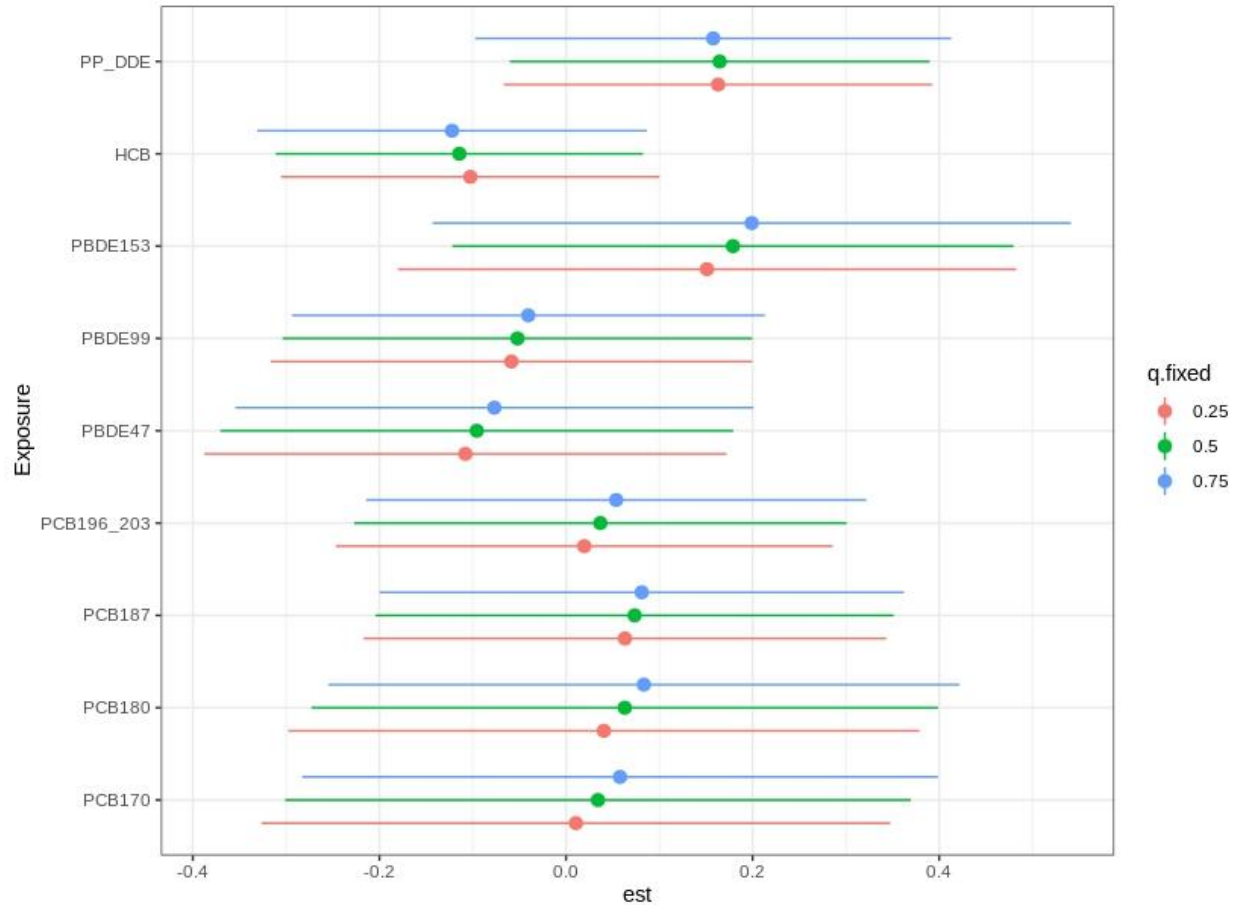

**Figure S5.** The single-exposure effects of each individual POPs congeners on VABS score (with corresponding 95% confidence intervals) are shown when an individual POP exposure was at its 75th percentile as compared to its 25th percentile, when all of the other POPs were fixed at a specific exposure percentile (25th, 50th, or 75th, respectively). Only POPs that were associated with VABS score from previous univariate exposure-response results were included in this analysis. Models adjusted for study site, child's sex, maternal education, maternal race, and maternal pre-pregnancy BMI. POPs were scaled in the BKMR models

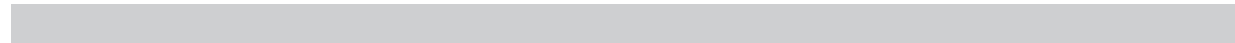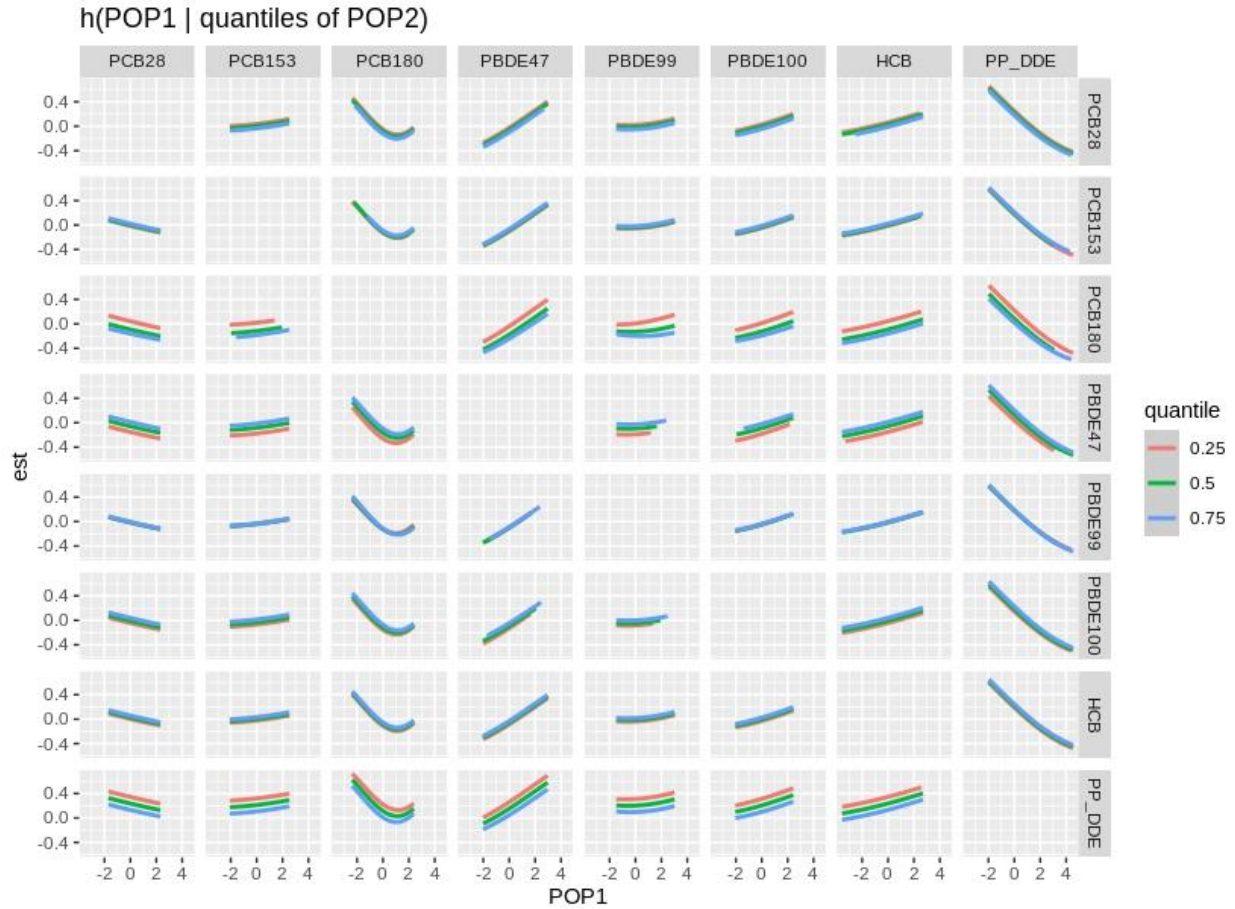

**Figure S6.** Bivariate exposure-response functions for SRS score using BKMR. Associations between each POP (column, POP1) and SRS, setting a second POP (row, POP2) to its 25<sup>th</sup>, 50<sup>th</sup>, and 75<sup>th</sup> percentile and all other POPs to their median. Models adjusted for study site, child's sex, maternal education, maternal race, and maternal pre-pregnancy BMI. POPs were scaled in the BKMR models



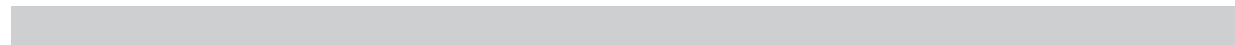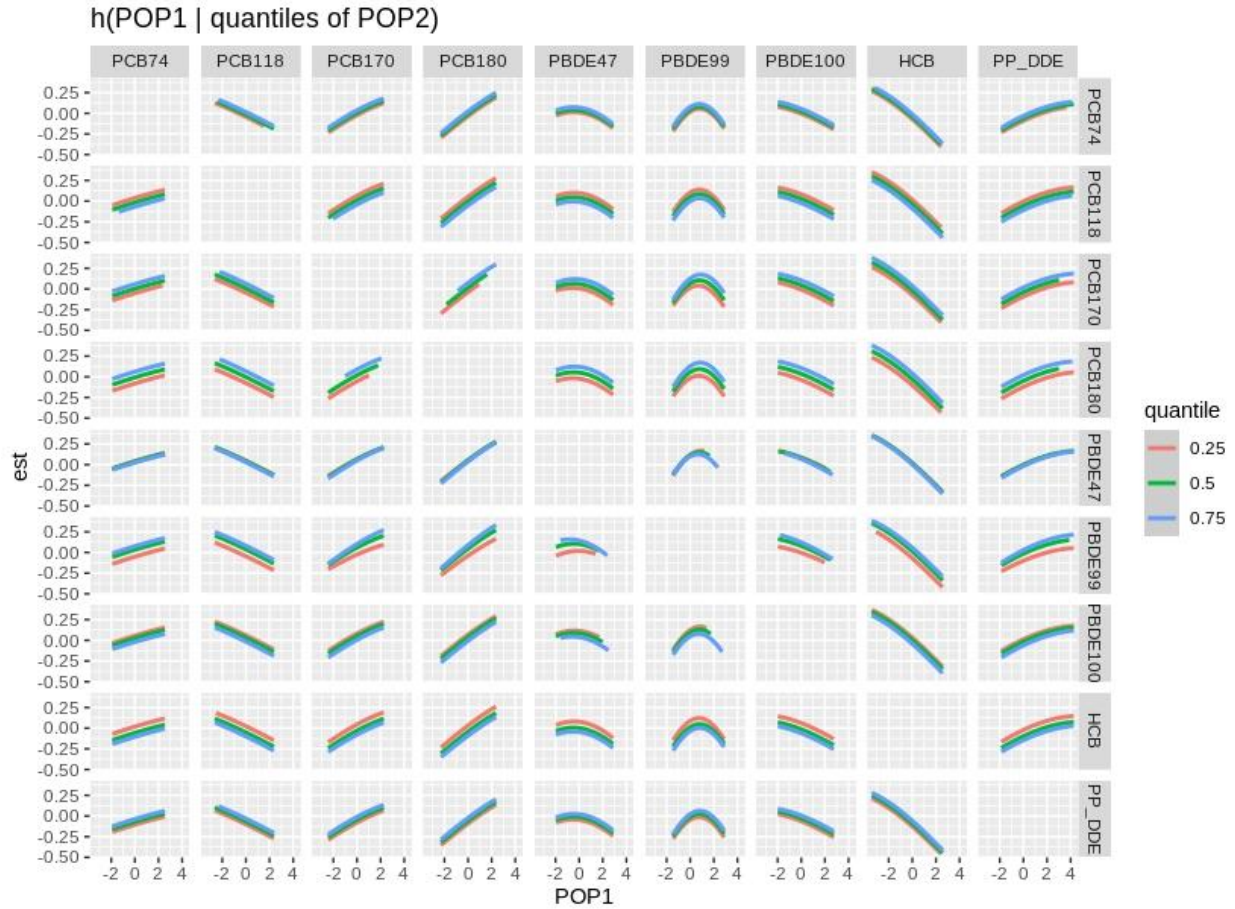

**Figure S7.** Bivariate exposure-response functions for MSEL-ELC score using BKMR. Associations between each POP (column, POP1) and MSEL-ELC, setting a second POP (row, POP2) to its 25<sup>th</sup>, 50<sup>th</sup>, and 75<sup>th</sup> percentile and all other POPs to their median. Models adjusted for study site, child's sex, maternal education, maternal race, and maternal pre-pregnancy BMI. POPs were scaled in the BKMR models

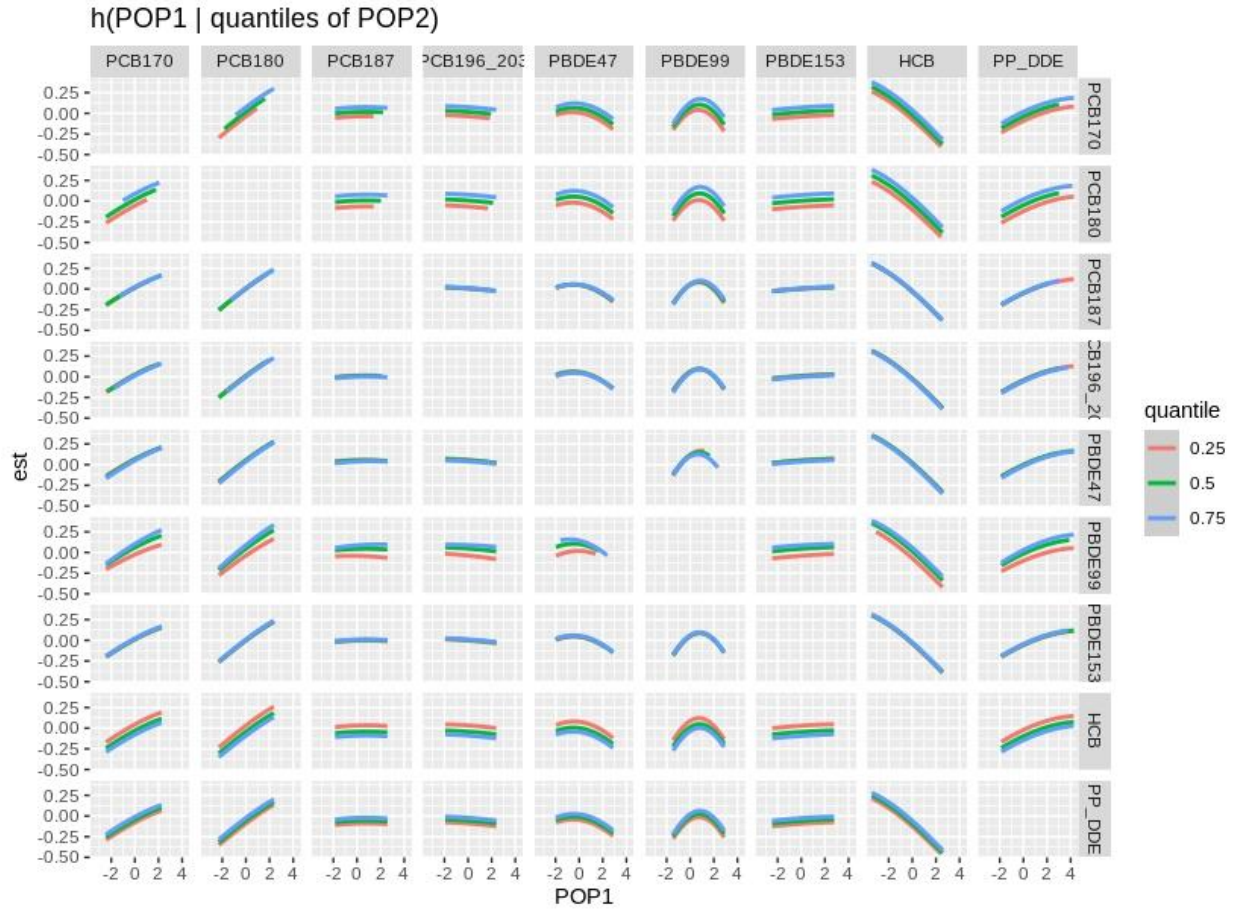

**Figure S8.** Bivariate exposure-response functions for VABS score using BKMR. Associations between each POP (column, POP1) and VABS, setting a second POP (row, POP2) to its 25<sup>th</sup>, 50<sup>th</sup>, and 75<sup>th</sup> percentile and all other POPs to their median. Models adjusted for study site, child's sex, maternal education, maternal race, and maternal pre-pregnancy BMI. POPs were scaled in the BKMR models

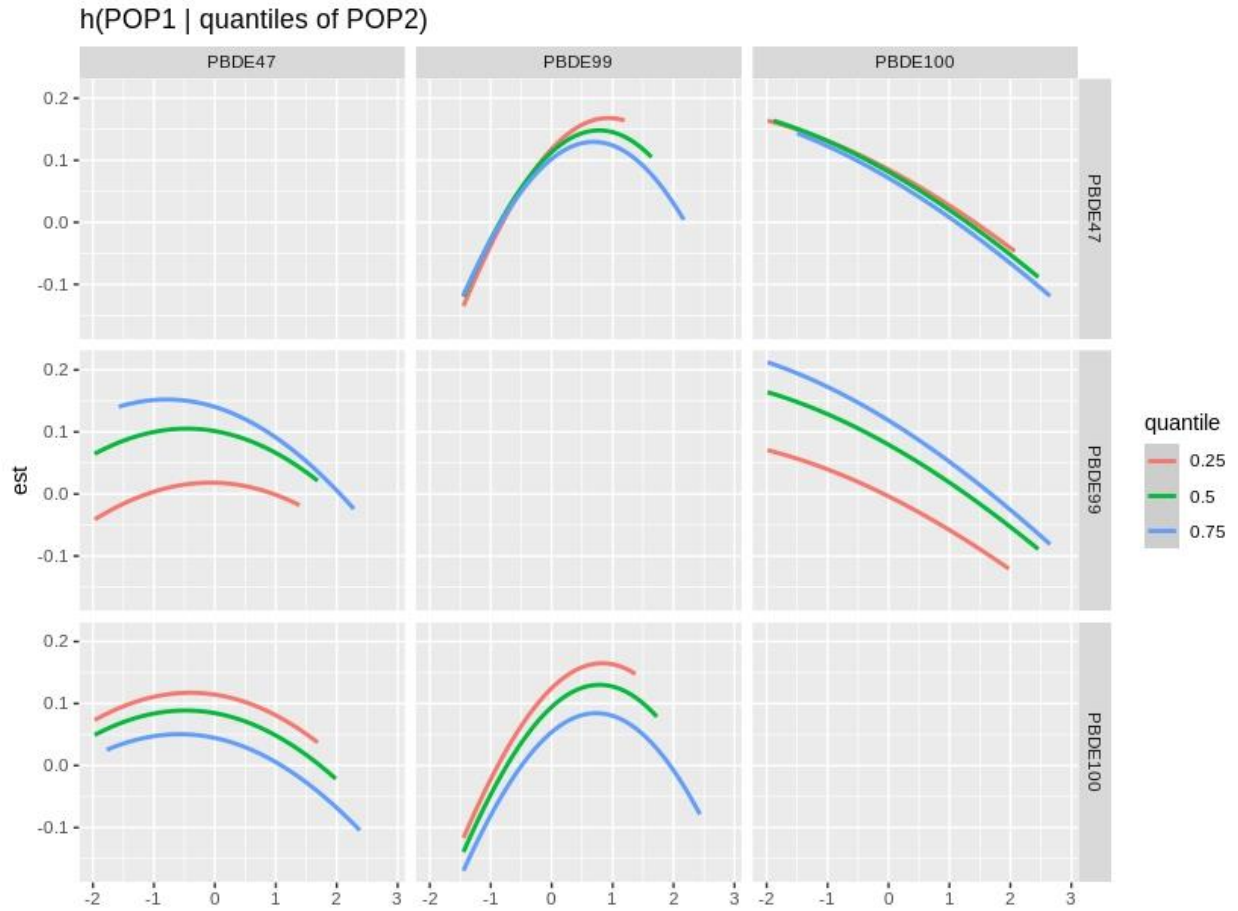

**Figure S9.** Bivariate exposure-response functions for PBDE47, PBDE99, and PBDE100 with MSEL-ELC score using BKMR. Associations between each PBDE (column, POP1) and MSEL-ELC, setting a second PBDE (row, POP2) to its 25<sup>th</sup>, 50<sup>th</sup>, and 75<sup>th</sup> percentile and all other POPs to their median. Models adjusted for study site, child's sex, maternal education, maternal race, and maternal pre-pregnancy BMI. POPs were scaled in the BKMR models

**Table S3.** Association between POPs mixture and quantitative traits in quantile g-computation models by each POP class

|                | $\beta$ (95% CI)     | p-value |
|----------------|----------------------|---------|
| SRS score      |                      |         |
| PCBs           | -6.10 (-14.68, 2.47) | 0.17    |
| PBDEs          | 1.95 (-4.13, 8.02)   | 0.53    |
| Pesticides     | 2.15 (-2.66, 6.95)   | 0.38    |
| MSEL-ELC score |                      |         |
| PCBs           | 6.53 (-0.67, 13.73)  | 0.08    |
| PBDEs          | 1.35 (2.18, 5.63)    | 0.54    |
| Pesticides     | 0.89 (-2.22, 3.99)   | 0.58    |
| VABS score     |                      |         |
| PCBs           | -5.10 (-11.08, 0.88) | 0.10    |
| PBDEs          | -0.76 (-4.31, 2.78)  | 0.67    |
| Pesticides     | 0.94 (-1.52, 3.40)   | 0.45    |

Estimated beta represents differences in quantitative traits per one-quantile increase in each mixture groups: PCBs, PBDEs, persistent pesticides. Models adjusted for study site, child's sex, maternal education, maternal race, and maternal pre-pregnancy BMI

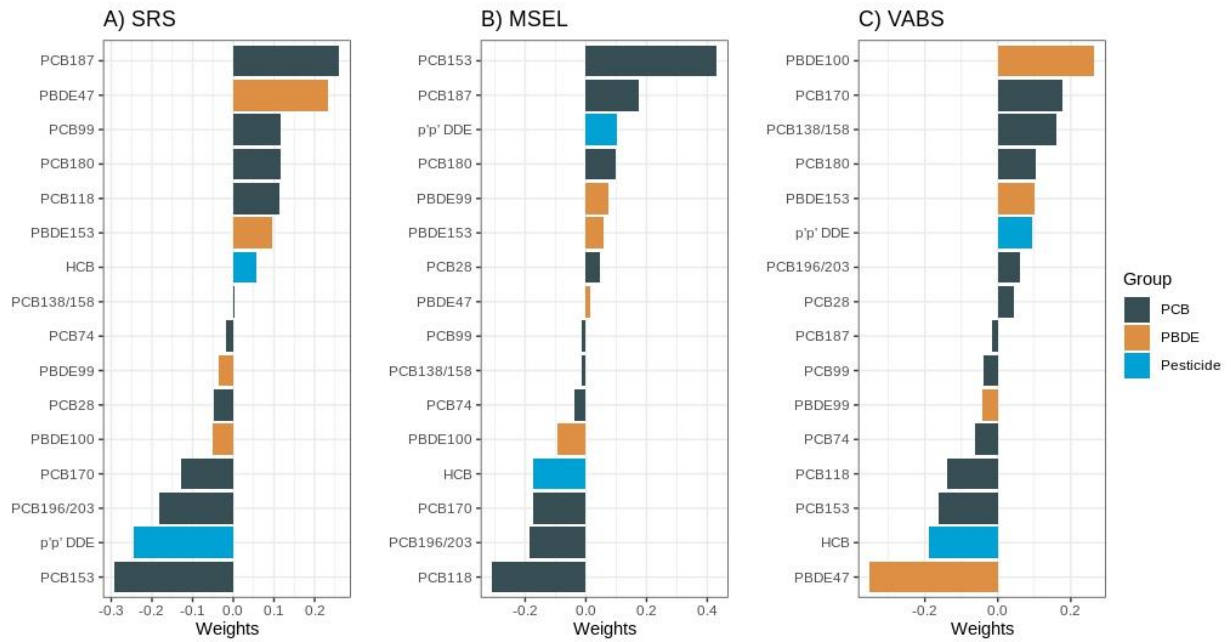

**Figure S10.** Weights of each POP from quantile g-computation model results for A) SRS score, B) MSEL Score, and C) VABS score. Weights represent the proportion of the positive or negative partial effect for each component in the mixture on the quantitative traits. Models adjusted for study site, child's sex, maternal education, maternal race, and maternal pre-pregnancy BMI
